# Supplementary material for: New data on gersdorffite and associated minerals from the Peloritani Mountains (Sicily, Italy)
Source: Copernicus journal article supplement (doi:10.5194/ejm-33-717-2021), 2021-11-19
Supplement: Supplementary file 1 [file ejm-33-717-2021-supplement.zip]

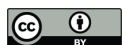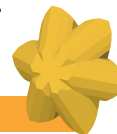

*Supplement of*

**New data on gersdorffite and associated minerals from the Peloritani Mountains (Sicily, Italy)**

**Daniela Mauro et al.**

*Correspondence to:* Daniela Mauro ([daniela.mauro@unipi.it](mailto:daniela.mauro@unipi.it))

- [ejm-33-717-2021-supplement-title-page.pdf](#)
- [gersdorffite.cif](#)
- [tetrahedrite-\(Fe\).cif](#)

The copyright of individual parts of the supplement might differ from the article licence.
